# Supplementary material
Source: MDPI journal article supplement (https://www.mdpi.com/1099-4300/24/7/998)
Supplement: s1 [file s1]

## Supplementary File S1

### Full list of variables in Table 1

As follows, a complete description of variables listed in Table 1:

1.  $t$ , time: this variable is required to verify which other variable is varying during dynamics;
2.  $DBA$ , degree-based assortativity: this variable measures the probability that two connected nodes have also similar degrees [1];
3.  $Dy$ , dyadicity, represents the ratio between the number of edges connecting nodes with the same hydrophobicity (either negative or positive, according to the Kyte-Doolittle hydrophobicity scale[2]) over the number of those expected in a random distribution (with respect to hydrophobicity);
4.  $H$ , heterophilicity, it is the dual property of  $Dy$ , it is the ratio between edges connecting nodes with dissimilar hydrophobicity over the number in a random distribution with respect to hydrophobicity;
5.  $HBA$ , hydrophobicity-based assortativity: it measures the probability that two connected nodes have also similar hydrophobicity;
6.  $abtw$ , average betweenness: the average value of the aforementioned PCN betweenness centrality averaged over the number of nodes (residues);
7.  $R_G$ , radius of gyration: it is the radius of gyration of the protein molecular structure, defined as:

$$R_G = \sqrt{\frac{1}{2} \frac{\sum_{i=1}^n m_i r_i^2}{\sum_{i=1}^n m_i}} \quad (5)$$

the sum is extended to all  $n$  residues;

8.  $R_{Gh}$ , radius of gyration of hydrophobic residues: as for the general definition, the sum refers only to hydrophobic residues;
9.  $R_{Gp}$ , radius of gyration of polar residues: as for the general definition, the sum refers only to polar residues;
10.  $acc$ , average clustering coefficient: it measures the average value of the above described clustering coefficient, averaged over the number  $n$  of nodes (residues);
11.  $adeg$ , average degree: it measures the average value of the aforementioned node degree, averaged over the number  $n$  of nodes (residues);

12. *asp*, average shortest path: it is the average value of the shortest paths connecting node pairs in the network, averaged over the whole number  $n(n - 1)/2$  of node pairs;
13. *corrHB*, hydrophobic core probability: it measures the probability of a residue to be placed with respect to the protein center of mass according to its hydrophobicity;
14. *aclose*, average closeness centrality: the average value of the above described closeness centrality, averaged over the number  $n$  of nodes (residues);
15.  $\rho$ , protein mass density: it measures the ratio between the protein mass and its volume, in units of  $g/mol \text{ \AA}^3$ ;
16. *MFD*, mass fractal dimension: it is defined according to the Hausdorff scaling law [3]:

$$M \propto R^{MFD} \quad (6)$$

It is close to 3 for compact 3D objects, close to 1 for linear, rodlike shapes, while fractal dimensions close to 2 indicate characterize planar structures. Typically, the protein folding process generates shapes in between 2 and 3 MFD values [4].

17.  $\varepsilon$ , protein porosity: it is defined as the void fraction of the protein volume;
18. *AS*, the asymmetry index: it provides a quantitative description of the protein molecular shape [5]. When close to 0, the protein molecule is globular, close to 0.5 it is principally a plane molecule, whereas *AS* approaches to 1 for rodlike molecular proteins;
19. *E*, graph energy. It is a purely topological descriptor, which is computed as the sum of the absolute values of the adjacency matrix *A* eigenvalues. It is correlated to protein structural stability and has already been introduced to characterize the protein-protein interactions [6].

We applied three different statistical tools to the  $m \times p$  matrix *M* (being  $m=19$  the number of variables, as above detailed, and  $p$  the number of frames we applied the analysis to) of the structural properties:

1. Correlation analysis: we computed the Pearson correlation analysis of the matrix *M* to highlight the correlation patterns between variables; we also applied the partial correlation between pair of variables, excluding the effect of a third, to determine the degree of association between the two variables (under the hypothesis of randomness), removing the effect of a third controlling variable. This metrics is particularly suited to reveal real mutual effects between variables in complex systems [7,8]; we'll use the following notation  $corr(X,Y)_Z$ , meaning "the partial correlation of the variables *X* and *Y* excluding the effect of variable *Z*".

2. Canonical Analysis: on the basis of results of correlation and Principal Component Analysis, it is possible to group variables into categories; for instance, as for the abovementioned variables, it is possible to identify a Topological Group,

$X_2 = \{adeg, asp, abtw, aclose, acc, E\}$  and a Structural Group

$X_3 = \{R_G, R_{Gh}, R_{Gp}, \rho, \varepsilon, AS, MFD\}$ . The Canonical Analysis finds the linear combination within groups providing the pair of variables  $(X_1^{OPT}, X_2^{OPT})$  which scores the highest Pearson Correlation Coefficient. We added as separate variable to this analysis the time:  $X_1 = t$ .

3. Principal Component Analysis (PCA): this methodology allows to transform the  $M=m \times p$  matrix of observations in a new set of orthogonal variables, the Principal Components (PCs), which are linear transformations of the original set  $m \times p$ . Principal Components loadings are the Pearson correlation coefficients between the original variables and PCs.

## **Protein contact network analysis of $\beta_2$ adrenergic receptor**

The Protein contact network analysis of crystal structures of  $\beta_2$  adrenergic receptor in the active PDB: 3SN6 and inactive PDB: 3NYA states, respectively.

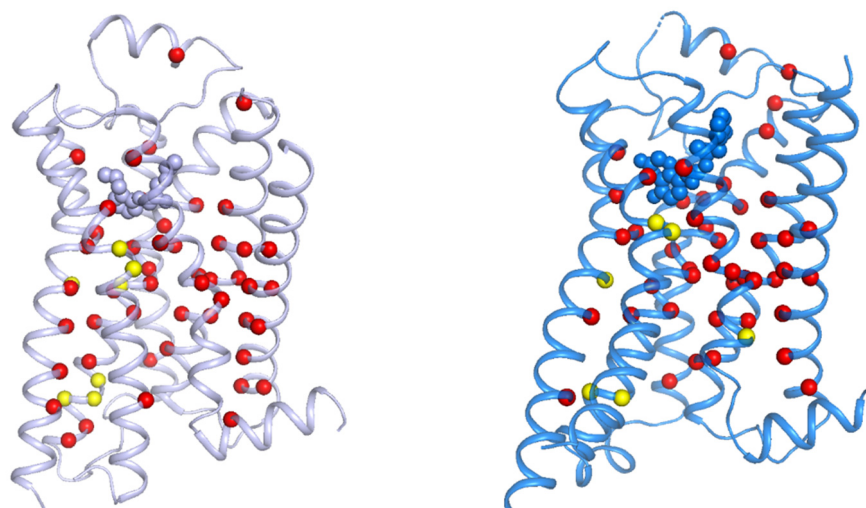

**Figure S1.** The residues that have a degree value larger than 10 ( $k_i > 10$ ) in the protein contact network are shown as spheres. Left: The inactive state PDB: 3NYA and right: active state PDB: 3SN6 are shown. In yellow the residues that belong the motifs of  $\beta_2$ -AR are highlighted.

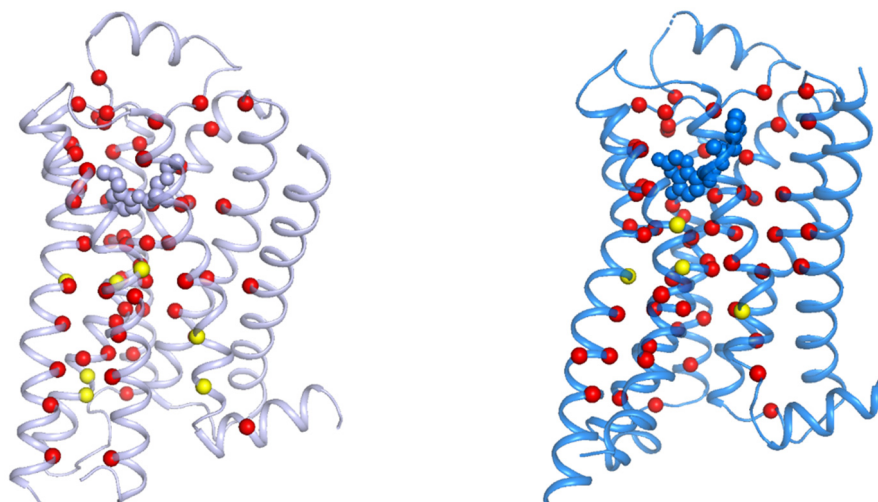

**Figure S2.** The residues that have the betweenness centrality measure value larger than 1200 in the Protein Contact Networks analysis are shown as spheres. Left: The inactive state PDB: 3NYA and right: active state PDB: 3SN6 are shown. In yellow the residues that fall in the motifs of  $\beta_2$ -AR are highlighted.

## REFERENCES

- [1] M.E.J. Newman, Assortative Mixing in Networks, *Physical Review Letters*. 89 (2002). <https://doi.org/10.1103/PhysRevLett.89.208701>.
- [2] J. Kyte, R.F. Doolittle, A simple method for displaying the hydropathic character of a protein, *Journal of Molecular Biology*. 157 (1982). [https://doi.org/10.1016/0022-2836\(82\)90515-0](https://doi.org/10.1016/0022-2836(82)90515-0).
- [3] M.B. Enright, D.M. Leitner, Mass fractal dimension and the compactness of proteins, *Physical Review E - Statistical, Nonlinear, and Soft Matter Physics*. 71 (2005). <https://doi.org/10.1103/PhysRevE.71.011912>.
- [4] L. di Paola, P. Paci, D. Santoni, M. de Ruvo, A. Giuliani, Proteins as sponges: A statistical journey along protein structure organization principles, in: *Journal of Chemical Information and Modeling*, 2012: pp. 474–482. <https://doi.org/10.1021/ci2005127>.
- [5] N. Arrigo, P. Paci, L. di Paola, D. Santoni, M. de Ruvo, A. Giuliani, F. Castiglione, Characterizing Protein Shape by a Volume Distribution Asymmetry Index, *The Open Bioinformatics Journal*. 6 (2012). <https://doi.org/10.2174/1875036201206010020>.
- [6] A. di Venere, E. Nicolai, V. Minicozzi, A.M. Caccuri, L. di Paola, G. Mei, The Odd Faces of Oligomers: The Case of TRAF2-C, A Trimeric C-Terminal Domain of TNF Receptor-Associated Factor, *International Journal of Molecular Sciences*. 22 (2021) 5871. <https://doi.org/10.3390/ijms22115871>.
- [7] C.S. de P. Perez, A. Zaccaria, T. di Matteo, Asymmetric Relatedness from Partial Correlation, *Entropy*. 24 (2022). <https://doi.org/10.3390/e24030365>.
- [8] A. de la Fuente, N. Bing, I. Hoeschele, P. Mendes, Discovery of meaningful associations in genomic data using partial correlation coefficients, *Bioinformatics*. 20 (2004). <https://doi.org/10.1093/bioinformatics/bth445>.
